# Supplementary material for: RNA-Seq Identifies SNP Markers for Growth Traits in Rainbow Trout
Source: PLoS One. 2012 May 4;7(5):e36264. doi: 10.1371/journal.pone.0036264 (PMC3344853; doi:10.1371/journal.pone.0036264)
Supplement: Table S5 — Markers’ heterozygosity and minor allele frequency (MAF) in outbred populations, 96 individuals were genotyped from 12 rainbow trout families (8 fish/family) representing 3 outbred populations from the Hagerman Fish Culture Experiment Station (HF), Clear Springs Foods (CS) and Troutlodge Inc (TL). (XLSX) [file pone.0036264.s005.xlsx]

## Sheet: Sheet1
Table S5.
SNP	GenBank dbSNP SS#	TL			CS			HF
		A1	A2	MAF	A1	A2	MAF	A1	A2	MAF
nuSNP1	475890914	Assay failed
nuSNP2	475890917	T	C	0.05645	0	C	0	0	C	0
nuSNP3	475890919	A	G	0.1452	A	G	0.2083	A	G	0.2333
nuSNP4	475890921	G	T	0.007812	0	T	0	G	T	0.09375
nuSNP5	475890923	C	T	0.09524	C	T	0.3462	C	T	0.3333
nuSNP6	475890925	Monomorphic C allele
nuSNP7	475890927	C	A	0.02381	C	A	0.03571	C	A	0.03125
nuSNP8	475890929	Assay failed
nuSNP9*	475890931	A	T	0.2966	T	A	0.3667	T	A	0.2308
nuSNP10	475890933	T	C	0.09677	0	C	0	0	C	0
nuSNP11	475890935	G	A	0.1484	G	A	0.1429	G	A	0.2188
nuSNP12	475890937	C	T	0.07759	C	T	0.25	C	T	0.1
nuSNP13	475890939	0	T	0	0	T	0	G	T	0.09375
nuSNP14	475890941	G	T	0.4113	G	T	0.4583	G	T	0.4
nuSNP15	475890943	G	T	0.4224	G	T	0.4286	G	T	0.3571
nuSNP16*	475890945	A	G	0.2787	G	A	0.4	G	A	0.2812
nuSNP17	475890947	T	C	0.381	T	C	0.1	T	C	0.0625
nuSNP18	475890949	A	C	0.3175	A	C	0.03846	A	C	0.03125
nuSNP19	475890951	A	G	0.1905	0	G	0	A	G	0.0625
nuSNP20	475890953	G	A	0.246	G	A	0.1538	G	A	0.3125
nuSNP21	475890955	G	A	0.246	G	A	0.1538	G	A	0.3
nuSNP22*	475890957	G	A	0.3145	A	G	0.1667	A	G	0.1875
nuSNP23*	475890959	C	T	0.3125	T	C	0.1786	T	C	0.1875
nuSNP24	475890961	C	T	0.3095	T	C	0.1667	T	C	0.1875
nuSNP25	475890963	A	G	0.125	A	G	0.3462	A	G	0.1562
nuSNP26	475890965	C	G	0.3772	C	G	0.3636	C	G	0.2692
nuSNP27	475890967	C	G	0.05738	C	G	0.3333	C	G	0.4667
nuSNP28	475890969	T	C	0.2222	T	C	0.1154	T	C	0.3125
nuSNP29	475890971	Monomorphic G allele
nuSNP30	475890973	Monomorphic G allele
mtSNP1*	475890975	G	A	0.4531	A	G	0.2308	G	A	0.3125
mtSNP2	475890977	A	G	0.4531	G	A	0.3333	A	G	0.3125
mtSNP3	475890980	T	G	0.4531	T	G	0.2692	T	G	0.25
mtSNP4*	475890982	A	G	0.4219	A	G	0.2308	G	A	0.3125
mtSNP5*	475890984	G	A	0.2593	G	A	0.25	A	G	0.3125
mtSNP6*	475890986	T	C	0.4355	T	C	0.1667	C	T	0.3667
mtSNP7*	475890988	G	A	0.4286	A	G	0.2667	A	G	0.25
mtSNP8	475890990	C	T	0.1429	C	T	0.06667	C	T	0.06667
mtSNP9	475890992	C	T	0.4286	C	T	0.2667	T	C	0.3125
mtSNP10*	475890994	C	T	0.2222	C	T	0.2667	T	C	0.2667
mtSNP11*	475890996	A	G	0.2222	A	G	0.2308	G	A	0.3125
mtSNP12*	475890998	C	T	0.2222	C	T	0.2308	T	C	0.3125
mtSNP13*	475891000	G	A	0.2222	G	A	0.2667	A	G	0.2667
mtSNP14*	475891002	G	A	0.2222	G	A	0.2667	A	G	0.3125
mtSNP15*	475891004	A	G	0.4219	A	G	0.2143	G	A	0.3125
mtSNP16	475891006	A	G	0.4531	A	G	0.2308	A	G	0.25
mtSNP17*	475891008	C	T	0.2222	C	T	0.2667	T	C	0.3125
mtSNP18*	475891010	T	C	0.2188	T	C	0.2143	C	T	0.3125
mtSNP19	475891012	G	A	0.4603	G	A	0.2308	G	A	0.25
mtSNP20*	475891014	T	C	0.4127	T	C	0.2308	C	T	0.3125
mtSNP21	475890912	G	A	0.1111	0	A	0	G	A	0.1538
mtSNP22*	475891016	A	C	0.2222	A	C	0.2667	C	A	0.3125
mtSNP23	475891018	Assay failed
mtSNP24*	475891020	A	G	0.2222	A	G	0.2308	G	A	0.3125
AVE. MAF				0.260232			0.207938			0.237597
# Polymorphic SNPs				47			42			46
